# Supplementary material for: Intracellular Secretory Leukoprotease Inhibitor Modulates Inositol 1,4,5-Triphosphate Generation and Exerts an Anti-Inflammatory Effect on Neutrophils of Individuals with Cystic Fibrosis and Chronic Obstructive Pulmonary Disease
Source: Hindawi journal article supplement (doi:10.1155/2013/560141), 2013-01-01
Supplement: f1 [file 560141.f1.pdf]

Supplementary Figure 1

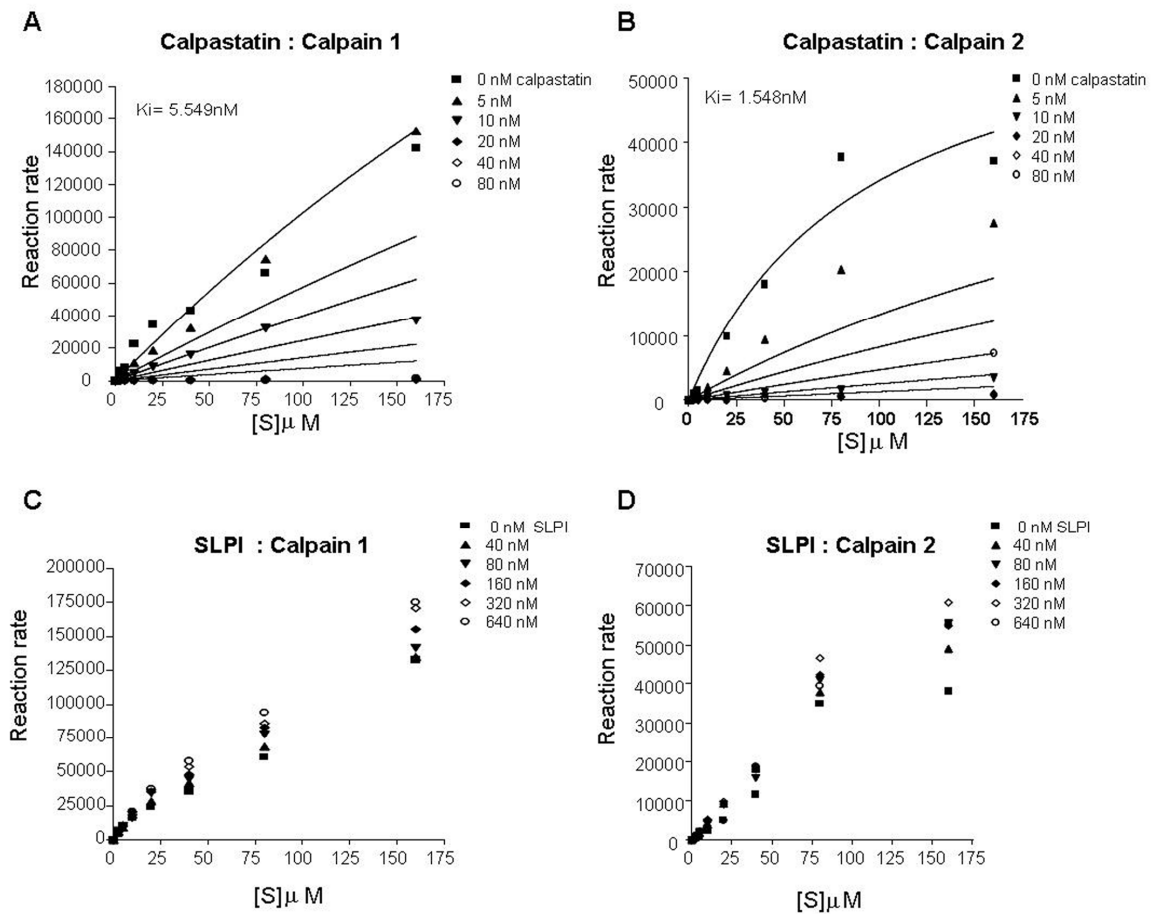

**Supplementary Figure 1. SLPI does not inhibit calpain 1 or calpain 2.** To determine whether SLPI inhibits calpain 1 or calpain 2 in a competitive manner, the  $K_i$  (inhibitor constant) value was determined using the Calpain-Glo(TM) Protease Assay Kit. When compared to the endogenous calpain 1 and 2 inhibitor calpastatin (A and B), SLPI had no inhibitory effect on calpain 1 or calpain 2 (C and D).
